# Supplementary material for: Switching between Janus kinase inhibitor upadacitinib and adalimumab following insufficient response: efficacy and safety in patients with rheumatoid arthritis
Source: HighWire-hosted journal article supplement (doi:10.1136/annrheumdis-2020-218412), 2020-11-04
Supplement: annrheumdis-2020-218412supp001_data_supplement.pdf [file annrheumdis-2020-218412supp001_data_supplement.pdf]

## **SUPPLEMENTARY MATERIAL**

### **Supplemental Text. Description of Blinded Rescue**

Patients in SELECT-COMPARE were rescued at weeks 14, 18, or 22 if they did not achieve  $\geq 20\%$  improvement from baseline in both tender and swollen joint count based on 68 or 66 joints, or at week 26 if they did not achieve low disease activity based on a Clinical Disease Activity Index (CDAI) score of  $\leq 10$ . All switches were fully blinded, i.e. investigators, study patients, and the study team remained blinded to the treatment assignments both prior to and following switch.

An interactive response technology (IRT) system was used to randomize patients at baseline and to manage the rescue and switch protocol in a blinded manner. At weeks 14, 18, 22, and 26 a “yes” or “no” response was generated by the IRT system regarding patient rescue based on information (i.e., tender and swollen joint counts) entered by the study site. At week 26, if low disease activity based on CDAI was not met a patient was switched to the other or started on blinded study drug as rescue treatment (including those originally on placebo). Each patient was only rescued once.

## Supplemental Figure S1. SELECT-COMPARE Study Design

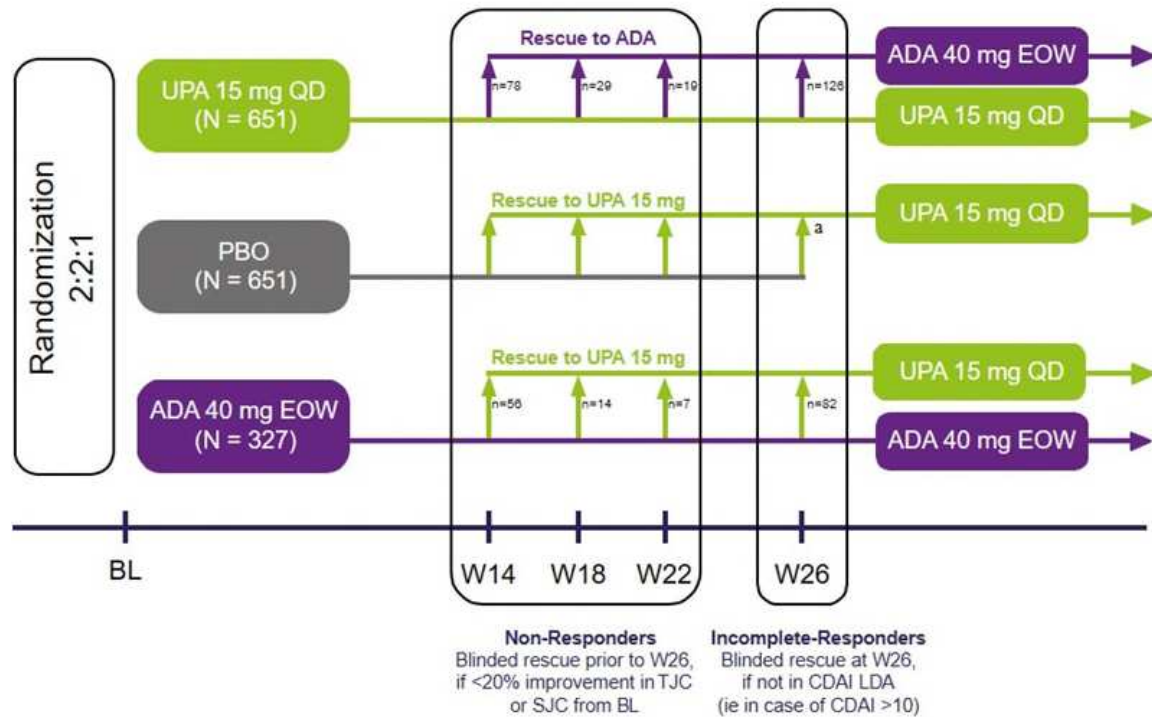

ADA, adalimumab; BL, baseline; CDAI, Clinical Disease Activity Index; EOW, every other week; LDA, low disease activity; QD, once daily; PBO, placebo; SJC, swollen joint count; TJC, tender joint count; UPA, upadacitinib

<sup>a</sup>All PBO patients not rescued at W14, 18, or 22 were switched to UPA 15 mg at W26 regardless of their response. Each patient could only be rescued once, and switch was immediate and without washout.

**Supplemental Figure S2. Change from Original Baseline in ACR response components HAQ-DI, TJC68, SJC66, PtGA, PhGA, Patient Assessment of Pain, and hsCRP for Non-responders [A] and Incomplete-responders [B]**

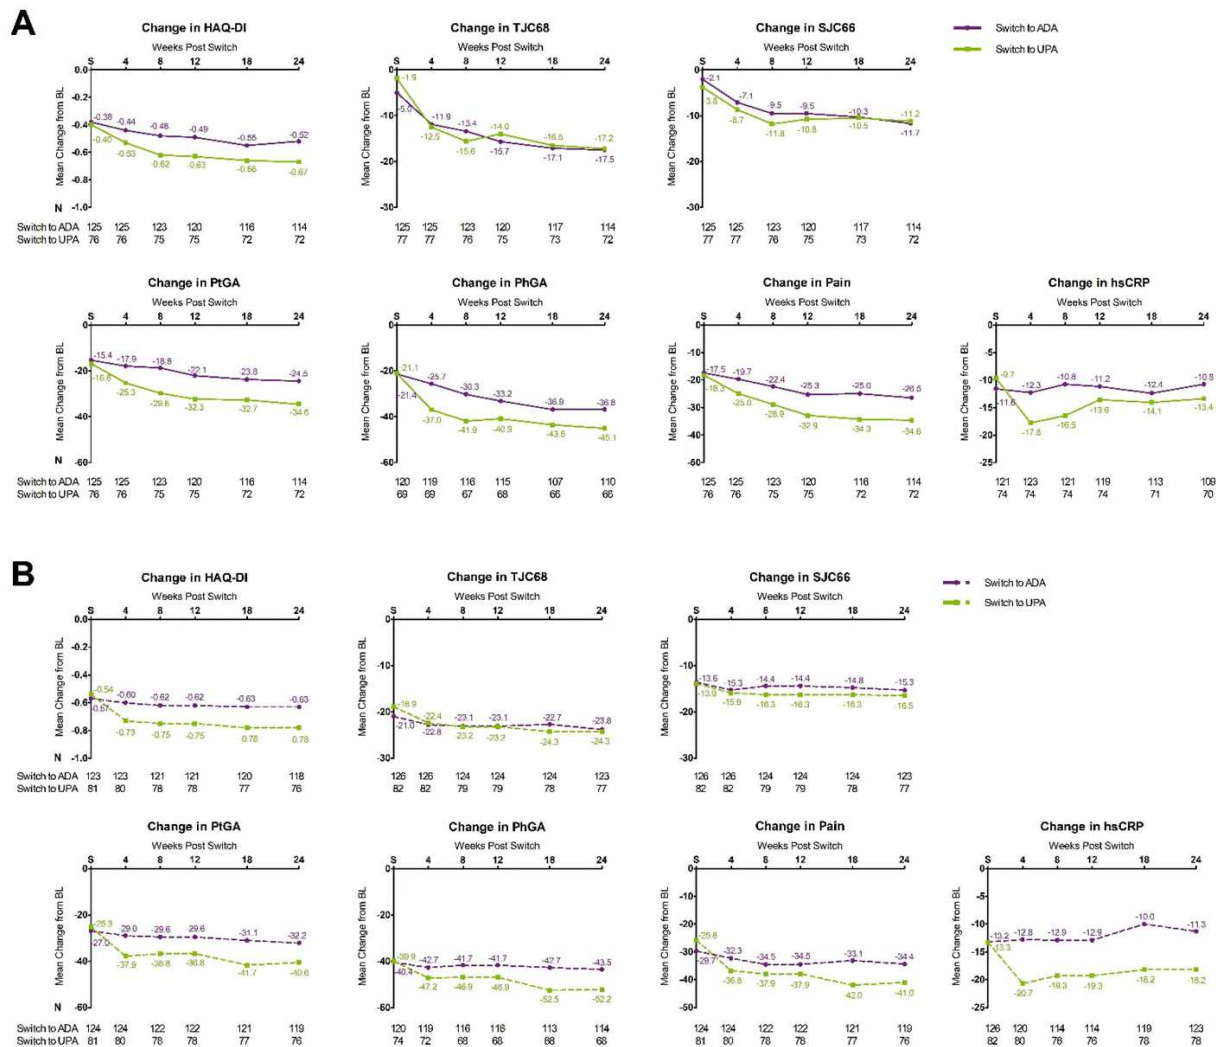

S denotes time of switch  
 ADA, adalimumab; HAQ-DI, Health Assessment Questionnaire Disability Index; hsCRP, high sensitivity C-reactive protein; PhGA, physician global assessment; PtGA, patient global assessment; SJC66, swollen joint count based on 66 joints; TJC68, tender joint count based on 68 joints; UPA, upadacitinib

**Supplemental Table S1. Patient Demographics and Disease Characteristics at Baseline and Switch**

| Mean (SD) <sup>a</sup>              | UPA Switch to ADA                                                           |                                                                           | ADA Switch to UPA                                                          |                     |                                                                          |                     |              |                     |
|-------------------------------------|-----------------------------------------------------------------------------|---------------------------------------------------------------------------|----------------------------------------------------------------------------|---------------------|--------------------------------------------------------------------------|---------------------|--------------|---------------------|
|                                     | Non-responders<br>(n = 126)<br>Rescued at W14/18/22<br>based on TJC68/SJC66 | Incomplete-responders<br>(n = 126)<br>Rescued at W26 based<br>on CDAI LDA | Non-responders<br>(n = 77)<br>Rescued at W14/18/22<br>based on TJC68/SJC66 |                     | Incomplete-responders<br>(n = 82)<br>Rescued at W26 based<br>on CDAI LDA |                     |              |                     |
| Mean (SD)                           | Baseline                                                                    | Switch <sup>b</sup>                                                       | Baseline                                                                   | Switch <sup>b</sup> | Baseline                                                                 | Switch <sup>b</sup> | Baseline     | Switch <sup>b</sup> |
| Age, years                          | 54.4 (11.4)                                                                 |                                                                           | 55.0 (11.9)                                                                |                     | 54.6 (10.7)                                                              |                     | 53.3 (10.6)  |                     |
| Female, No. (%)                     | 103 (81.7)                                                                  |                                                                           | 108 (85.7)                                                                 |                     | 63 (81.8)                                                                |                     | 70 (85.4)    |                     |
| Duration of RA,<br>years            | 9.0 (8.2)                                                                   |                                                                           | 7.0 (6.5)                                                                  |                     | 10.0 (10.3)                                                              |                     | 6.4 (5.9)    |                     |
| RF and/or ACPA<br>positive, No. (%) | 102 (81.0)                                                                  |                                                                           | 107 (84.9)                                                                 |                     | 64 (83.1)                                                                |                     | 72 (87.8)    |                     |
| CDAI                                | 40.7 (13.3)                                                                 | 31.1 (15.1)                                                               | 44.9 (12.9)                                                                | 17.1<br>(7.1)       | 37.6 (12.0)                                                              | 30.9 (13.8)         | 44.6 (13.9)  | 18.5 (9.4)          |
| DAS28(CRP)                          | 5.9<br>(1.0)                                                                | 4.8<br>(1.3)                                                              | 6.1<br>(0.9)                                                               | 3.8<br>(0.7)        | 5.8<br>(1.0)                                                             | 4.9<br>(1.2)        | 6.2<br>(0.9) | 4.1<br>(0.9)        |
| TJC68                               | 29.9 (17.1)                                                                 | 24.8 (16.7)                                                               | 31.1 (15.2)                                                                | 10.1 (8.3)          | 26.4<br>(15.32)                                                          | 24.5 (15.9)         | 29.7 (16.4)  | 10.8 (9.5)          |
| SJC66                               | 16.5 (10.5)                                                                 | 14.2 (11.4)                                                               | 19.2 (11.3)                                                                | 5.5<br>(7.1)        | 15.3 (8.3)                                                               | 11.5 (8.2)          | 19.0 (11.2)  | 5.2<br>(5.5)        |
| CRP, mg/L                           | 19.4 (24.8)                                                                 | 7.6<br>(15.1)                                                             | 19.8 (24.5)                                                                | 6.6 (18.2)          | 21.2 (23.5)                                                              | 11.1 (14.0)         | 24.0 (25.5)  | 10.7 (14.8)         |
| Pt pain, mm                         | 66.8 (19.5)                                                                 | 49.2 (24.8)                                                               | 72.2 (18.0)                                                                | 42.9 (23.3)         | 68.6 (18.0)                                                              | 50.3 (23.4)         | 69.9 (16.9)  | 44.1 (22.9)         |
| HAQ-DI                              | 1.7<br>(0.6)                                                                | 1.4<br>(0.7)                                                              | 1.8<br>(0.5)                                                               | 1.2<br>(0.6)        | 1.7<br>(0.6)                                                             | 1.3<br>(0.6)        | 1.8<br>(0.5) | 1.3<br>(0.5)        |
| PtGA                                | 63.7 (22.8)                                                                 | 48.2 (24.5)                                                               | 69.7 (18.2)                                                                | 43.2 (22.8)         | 68.0 (20.9)                                                              | 51.2 (23.7)         | 70.4 (17.1)  | 45.0 (22.8)         |
| PhGA                                | 64.6 (16.4)                                                                 | 43.4 (23.4)                                                               | 70.2 (16.0)                                                                | 30.6 (17.4)         | 65.0 (18.0)                                                              | 45.1 (22.4)         | 70.9 (16.0)  | 30.7 (19.0)         |

Abbreviations: ACPA, anti-citrullinated protein antibody; ADA, adalimumab; CDAI, Clinical Disease Activity Index; CRP, C-reactive protein; DAS28(CRP), 28-joint Disease Activity Score based on C-reactive protein; HAQ-DI, Health Assessment Questionnaire-Disability Index; PhGA, Physician's Global Disease Activity; PtGA, Patient's Assessment of Global Disease Activity; RA, rheumatoid arthritis; RF, rheumatoid factor; SD, standard deviation; SJC66, swollen joint count based on 66 joints; TJC68, tender joint count based on 68 joints; UPA, upadacitinib.

<sup>a</sup> Values are mean (SD) unless otherwise specified.

<sup>b</sup> Disease characteristics at time of switch.

**Supplemental Table S2. Disease Activity Measures 6 Months Post Switch for All Incomplete-Responders and Excluding Incomplete-Responders Who Were Rescued Despite Achieving CDAI LDA**

| % (n/N)                    | UPA Switch to ADA         |                                                             | ADA Switch to UPA         |                                                             |
|----------------------------|---------------------------|-------------------------------------------------------------|---------------------------|-------------------------------------------------------------|
|                            | All Incomplete-Responders | Excluding Pts (n = 9) Who Were Inadvertently Rescued at W26 | All Incomplete-Responders | Excluding Pts (n = 5) Who Were Inadvertently Rescued at W26 |
| ACR20                      | 77.3 (92/119)             | 74.6 (85/114)                                               | 86.7 (65/75)              | 73.7 (56/76)                                                |
| ACR50                      | 46.7 (56/120)             | 45.9 (51/111)                                               | 62.53 (45/72)             | 63.2 (43/68)                                                |
| ACR70                      | 18.5 (22/119)             | 17.1 (19/111)                                               | 39.2 (29/74)              | 41.4 (29/70)                                                |
| DAS28(CRP) $\leq 3.2$      | 43.8 (53/121)             | 42.9 (48/112)                                               | 57.1 (44/77)              | 54.2 (39/72)                                                |
| DAS28(CRP) $< 2.6$         | 23.1 (28/121)             | 22.3 (25/112)                                               | 37.78 (29/77)             | 36.1 (26/72)                                                |
| CDAI LDA                   | 45.0 (54/120)             | 43.2 (48/111)                                               | 57.9 (44/76)              | 56.3 (40/71)                                                |
| CDAI Remission             | 5.0 (6/120)               | 3.6 (4/111)                                                 | 15.8 (12/76)              | 15.5 (11/71)                                                |
| Mean Change from Baseline: |                           |                                                             |                           |                                                             |
| HAQ-DI                     | -0.6                      | -0.6                                                        | -0.8                      | -0.8                                                        |
| TJC68                      | -23.8                     | -20.4                                                       | -24.3                     | -19.4                                                       |
| SJC66                      | -15.3                     | -13.6                                                       | -16.5                     | -14.0                                                       |
| PtGA                       | -32.2                     | -33.2                                                       | -40.6                     | -40.8                                                       |
| PhGA                       | -43.5                     | -43.0                                                       | -52.2                     | -52.3                                                       |
| Pt Pain                    | -34.4                     | -34.9                                                       | -41.0                     | -40.9                                                       |
| hsCRP                      | -11.3                     | -11.0                                                       | -18.2                     | -17.1                                                       |

Abbreviations: ACR20/50/70, American College of Rheumatology response criteria; ADA, adalimumab; CDAI, Clinical Disease Activity Index; DAS28(CRP), 28-joint Disease Activity Score based on C-reactive protein; HAQ-DI, Health Assessment Questionnaire-Disability Index; hsCRP, high-sensitivity C-reactive protein; LDA, low disease activity; PhGA, Physician's Global Disease Activity; PtGA, Patient's Assessment of Global Disease Activity; SJC66, swollen joint count based on 66 joints; TJC68, tender joint count based on 68 joints; UPA, upadacitinib.

Data reported as observed.

**Supplemental Table S3. Demographics and Baseline Disease Characteristics of Patients Categorized as Double Non-responders (Based on CDAI) and Non-Double Non-responders**

| Mean (SD) <sup>a</sup>           | Double Non-responder<br>(n = 210) | Non-Double Non-responder <sup>a</sup><br>(n = 768) | Spearman<br>Correlation<br>Coefficient |
|----------------------------------|-----------------------------------|----------------------------------------------------|----------------------------------------|
| Age, years                       | 54.7 (11.1)                       | 53.9 (12.2)                                        | -0.003                                 |
| Duration of RA diagnosis, years  | 8.2 (8.3)                         | 8.2 (7.9)                                          | -0.010                                 |
| RF and/or ACPA positive, No. (%) | 176 (83.8)                        | 678 (88.3)                                         | -0.060                                 |
| CDAI                             | 44.1 (12.7)                       | 38.5 (12.8)                                        | 0.176                                  |
| DAS28(CRP)                       | 6.2 (0.9)                         | 5.7 (1.0)                                          | 0.185                                  |
| TJC68                            | 31.9 (16.4)                       | 24.9 (14.4)                                        | 0.184                                  |
| SJC66                            | 18.9 (11.0)                       | 15.8 (9.5)                                         | 0.134                                  |
| CRP, mg/L                        | 22.1 (27.4)                       | 17.6 (20.4)                                        | 0.051                                  |
| Pt pain, mm                      | 69.6 (15.3)                       | 64.3 (17.6)                                        | 0.131                                  |
| HAQ-DI                           | 1.8 (0.5)                         | 1.6 (0.6)                                          | 0.144                                  |
| PtGA                             | 70.4 (18.3)                       | 63.2 (22.2)                                        | 0.130                                  |
| PhGA                             | 69.6 (15.3)                       | 64.3 (17.6)                                        | 0.124                                  |

Abbreviations: ACPA, anti-citrullinated protein antibody; CDAI, Clinical Disease Activity Index; CRP, C-reactive protein; DAS28(CRP), 28-joint Disease Activity Score based on C-reactive protein; HAQ-DI, Health Assessment Questionnaire-Disability Index; PhGA, Physician's Global Disease Activity; PtGA, Patient's Assessment of Global Disease Activity; RA, rheumatoid arthritis; RF, rheumatoid factor; SD, standard deviation; SJC66, swollen joint count based on 66 joints; TJC68, tender joint count based on 68 joints.

<sup>a</sup> Values are mean (SD) unless otherwise specified.

<sup>b</sup> Non-double non-responder group includes patients who were rescued at any time point and responded to the second treatment, and patients who never switched.

**Supplemental Table S4. Univariate Logistic Regression of Double Non-response with Baseline Characteristics**

| Parameter <sup>a</sup>              | N   | Odds Ratio (95% CI)  | C (concordance) Index (95% CI) |
|-------------------------------------|-----|----------------------|--------------------------------|
| Age, years                          | 978 | 1.006 (0.993, 1.019) | 0.528 (0.485, 0.570)           |
| Duration of RA diagnosis, years     | 978 | 1.001 (0.982, 1.020) | 0.493 (0.488, 0.538)           |
| RF and/or ACPA positive             | 978 | 0.687 (0.448, 1.054) | 0.522 (0.495, 0.550)           |
| CDAI (0-76)                         | 921 | 1.033 (1.020, 1.046) | 0.623 (0.580, 0.667)           |
| DAS28(CRP) (0.96-9.4 <sup>b</sup> ) | 972 | 1.647 (1.389, 1.952) | 0.630 (0.588, 0.672)           |
| TJC68 (0-68)                        | 978 | 1.029 (1.019, 1.039) | 0.630 (0.587, 0.673)           |
| SJC66 (0-66)                        | 978 | 1.029 (1.014, 1.044) | 0.594 (0.551, 0.638)           |
| CRP, mg/L                           | 978 | 1.008 (1.002, 1.014) | 0.536 (0.491, 0.581)           |
| Pt pain (0-100 mm VAS)              | 978 | 1.018 (1.010, 1.026) | 0.592 (0.551, 0.633)           |
| HAQ-DI (0-3)                        | 971 | 1.864 (1.424, 2.439) | 0.601 (0.559, 0.643)           |
| PtGA (0-100 mm VAS)                 | 921 | 1.019 (1.009, 1.029) | 0.587 (0.544, 0.630)           |
| PhGA (0-100 mm VAS)                 | 972 | 1.017 (1.009, 1.025) | 0.592 (0.550, 0.634)           |

Abbreviations: ACPA, anti-citrullinated protein antibody; CDAI, Clinical Disease Activity Index; CI, confidence interval; CRP, C-reactive protein; DAS28(CRP), 28-joint Disease Activity Score based on C-reactive protein; HAQ-DI, Health Assessment Questionnaire-Disability Index; PhGA, Physician's Global Disease Activity; PtGA, Patient's Assessment of Global Disease Activity; RA, rheumatoid arthritis; RF, rheumatoid factor; SD, standard deviation; SJC66, swollen joint count based on 66 joints; TJC68, tender joint count based on 68 joints; VAS, visual analogue scale.

<sup>a</sup> Parameter evaluated at baseline. Parameter scale and/or ranges are provided in parentheses, when applicable, to aid the interpretation of the odds ratio.

<sup>b</sup> Max of 9.4 if CRP is 100 mg/L<sup>1</sup>

**Supplemental Table S5. Number and Percentage of Patients Experiencing TEAEs 0-3 Months and 4-6 Months Post Treatment Switch and While on Continuous Therapy**

| Adverse Events<br>No. (%) [95% CI] | 0-3 Months <sup>a</sup>          |                                |                                  |                                | 4-6 Months <sup>a</sup>          |                                |                                  |                                |
|------------------------------------|----------------------------------|--------------------------------|----------------------------------|--------------------------------|----------------------------------|--------------------------------|----------------------------------|--------------------------------|
|                                    | UPA 15 mg<br>to ADA<br>(n = 252) | Continuous<br>ADA<br>(n = 168) | ADA to UPA<br>15 mg<br>(n = 159) | Continuous<br>UPA<br>(n = 398) | UPA 15 mg<br>to ADA<br>(n = 252) | Continuous<br>ADA<br>(n = 168) | ADA to UPA<br>15 mg<br>(n = 159) | Continuous<br>UPA<br>(n = 398) |
| Any AE                             | 125 (49.6)<br>[43.5, 55.7]       | 86 (51.2)<br>[43.7, 58.6]      | 64 (40.3)<br>[33.0, 48.0]        | 193 (48.5)<br>[43.6, 53.4]     | 90 (35.7)<br>[30.1, 41.8]        | 63 (37.5)<br>[30.5, 45.0]      | 58 (36.5)<br>[29.4, 44.2]        | 168 (42.2)<br>[37.5, 47.1]     |
| Serious AE                         | 6 (2.4) [1.1,<br>5.1]            | 9 (2.3) [2.0,<br>8.4]          | 6 (3.8) [1.7,<br>8.0]            | 9 (2.3) [1.2,<br>4.2]          | 11 (4.4) [2.5,<br>7.7]           | 5 (3.0) [1.3,<br>6.8]          | 9 (5.7) [3.0,<br>10.4]           | 5 (1.3) [0.5,<br>2.9]          |
| AE leading to D/C                  | 7 (2.8) [1.4,<br>5.6]            | 18 (4.5) [6.0,<br>14.9]        | 3 (1.9) [0.6,<br>5.4]            | 18 (4.5) [2.9,<br>7.0]         | 8 (3.2) [1.6,<br>6.1]            | 5 (3.0) [1.3,<br>6.8]          | 5 (3.1) [1.4,<br>7.3]            | 4 (1.0) [0.4,<br>2.6]          |
| Deaths                             | 0 [0.0, 1.5]                     | 0 [0.1, 3.3]                   | 0 [0.0, 2.4]                     | 0 [0.0, 1.0]                   | 0 [0.0, 1.5]                     | 1 (0.6) [0.1,<br>3.3]          | 0 [0.0, 2.4]                     | 0 [0.0, 1.0]                   |
| Infection                          | 41 (16.3)<br>[12.3, 21.3]        | 40 (23.8)<br>[18.0, 30.8]      | 30 (18.9)<br>[13.6, 25.7]        | 100 (25.1)<br>[21.1, 29.6]     | 46 (18.3)<br>[14.0, 23.5]        | 32 (19.0)<br>[13.8, 25.7]      | 29 (18.2)<br>[13.0, 25.0]        | 89 (22.4)<br>[18.5, 26.7]      |
| Serious infection                  | 2 (0.8) [0.2,<br>2.9]            | 3 (1.8) [0.6,<br>5.1]          | 4 (2.5) [1.0,<br>6.3]            | 6 (1.5) [0.7,<br>3.3]          | 3 (1.2) [0.4,<br>3.4]            | 1 (0.6) [0.1,<br>3.3]          | 2 (1.3) [0.4,<br>4.5]            | 1 (0.3) [0.0,<br>1.4]          |
| Opportunistic infection            | 0 [0.0, 1.5]                     | 1 (0.6) [0.1,<br>3.3]          | 1 (0.6) [0.1,<br>3.5]            | 2 (0.5) [0.1,<br>1.8]          | 0 [0.0, 1.5]                     | 0 [0.0, 2.2]                   | 1 (0.6) [0.1,<br>3.5]            | 0 [0.0, 1.0]                   |
| Herpes zoster                      | 1 (0.4) [0.1,<br>2.2]            | 1 (0.6) [0.1,<br>3.3]          | 2 (1.3) [0.4,<br>4.5]            | 3 (0.8) [0.3,<br>2.2]          | 2 (0.8) [0.2,<br>2.9]            | 0 [0.0, 2.2]                   | 2 (1.3) [0.4,<br>4.5]            | 0 [0.0, 1.0]                   |
| TB                                 | 0 [0.0, 1.5]                     | 0 [0.0, 2.2]                   | 0 [0.0, 2.4]                     | 0 [0.0, 1.0]                   | 7 (2.8) [1.4,<br>5.6]            | 0 [0.0, 2.2]                   | 3 (1.9) [0.6,<br>5.4]            | 1 (0.3) [0.0,<br>1.4]          |
| Malignancy (excl. NMSC)            | 0 [0.0, 1.5]                     | 0 [0.0, 2.2]                   | 1 (0.6) [0.1,<br>3.5]            | 0 [0.0, 1.0]                   | 1 (0.4) [0.1,<br>2.2]            | 0 [0.0, 2.2]                   | 0 [0.0, 2.4]                     | 0 [0.0, 1.0]                   |
| NMSC                               | 0 [0.0, 1.5]                     | 1 (0.6) [0.1,<br>3.3]          | 0 [0.0, 1.0]                     | 0 [0.0, 1.0]                   | 0 [0.0, 1.5]                     | 0 [0.0, 2.2]                   | 0 [0.0, 2.4]                     | 0 [0.0, 1.0]                   |
| GI perforation <sup>b</sup>        | 0 [0.0, 1.5]                     | 0 [0.0, 2.2]                   | 0 [0.0, 2.4]                     | 2 (0.5) [0.1,<br>1.8]          | 0 [0.0, 1.5]                     | 0 [0.0, 2.2]                   | 1 (0.6) [0.1,<br>3.5]            | 0 [0.0, 1.0]                   |
| Adjudicated MACE                   | 0 [0.0, 1.5]                     | 0 [0.0, 2.2]                   | 0 [0.0, 2.4]                     | 0 [0.0, 1.0]                   | 0 [0.0, 1.5]                     | 2 (1.2) [0.3,<br>4.2]          | 0 [0.0, 2.4]                     | 0 [0.0, 1.0]                   |
| Adjudicated VTE                    | 0 [0.0, 1.5]                     | 2 (1.2) [0.3,<br>4.2]          | 0 [0.0, 2.4]                     | 0 [0.0, 1.0]                   | 0 [0.0, 1.5]                     | 1 (0.6) [0.1,<br>3.3]          | 1 (0.6) [0.1,<br>3.5]            | 0 [0.0, 1.0]                   |
| Hepatic disorder                   | 8 (3.2) [1.6,<br>6.1]            | 6 (3.6) [1.7,<br>7.6]          | 4 (2.5) [1.0,<br>6.3]            | 22 (5.5) [3.7,<br>8.2]         | 8 (3.2) [1.6,<br>6.14]           | 2 (1.2) [0.3,<br>4.2]          | 2 (1.3) [0.4,<br>4.5]            | 11 (2.8) [1.6,<br>4.9]         |
| Anemia                             | 3 (1.2) [0.4,<br>3.4]            | 2 (1.2) [0.3,<br>4.2]          | 2 (1.3) [0.4,<br>4.5]            | 6 (1.5) [0.7,<br>3.3]          | 1 (0.4) [0.1,<br>2.2]            | 0 [0.0, 2.2]                   | 2 (1.3) [0.4,<br>4.5]            | 1 (0.3) [0.0,<br>1.4]          |
| Neutropenia                        | 4 (1.6) [0.6,<br>4.0]            | 0 [0.0, 2.2]                   | 2 (1.3) [0.4,<br>4.5]            | 7 (1.8) [0.9,<br>3.6]          | 2 (0.8) [0.2,<br>2.9]            | 2 (1.2) [0.3,<br>4.2]          | 1 (0.6) [0.1,<br>3.5]            | 6 (1.5) [0.7,<br>3.4]          |
| Lymphopenia                        | 1 (0.4) [0.1,<br>2.2]            | 0 [0.0, 2.2]                   | 1 (0.6) [0.1,<br>3.5]            | 8 (2.0) [1.0,<br>3.9]          | 1 (0.4) [0.1,<br>2.2]            | 0 [0.0, 2.2]                   | 0 [0.0, 2.4]                     | 2 (0.5) [0.1,<br>1.8]          |
| CPK elevation                      | 2 (0.8) [0.2,<br>2.9]            | 1 (0.6) [0.1,<br>3.3]          | 0 [0.0, 2.3]                     | 7 (1.8) [0.9,<br>3.6]          | 1 (0.4) [0.1,<br>2.2]            | 1 (0.6) [0.1,<br>3.3]          | 1 (0.6) [0.1,<br>3.5]            | 4 (1.0) [0.4,<br>2.6]          |

Abbreviations: ADA, adalimumab; AE, adverse event; CI, confidence interval; CPK, creatine phosphokinase; D/C, discontinuation; GI, gastrointestinal; MACE, major adverse cardiovascular event; NMSC, non-melanoma skin cancer; TB, tuberculosis; TEAE, treatment-emergent adverse events; UPA, upadacitinib; VTE, venous thromboembolism.

<sup>a</sup> Data for switch groups are 0-3 and 4-6 months post switch. Data for continuous groups are from non-switchers and matching time periods starting at original randomization (months 0-3 and 4-6 of continuous therapy).

<sup>b</sup> Gastrointestinal perforations were identified through Standardized Medical Dictionary for Regulatory Activities query.

Values are the number (%) of patients with events. Confidence intervals are calculated using the Wilson method.



| <b>Supplemental Table S6. Data Points Plotted in Figure 2</b> |                   |               |               |               |               |               |
|---------------------------------------------------------------|-------------------|---------------|---------------|---------------|---------------|---------------|
| Parameter, n/N (%)                                            | Weeks Post Switch |               |               |               |               |               |
|                                                               | 0                 | 4             | 8             | 12            | 18            | 24            |
| <b>A. Non-responders</b>                                      |                   |               |               |               |               |               |
| ACR20                                                         |                   |               |               |               |               |               |
| Switch to UPA                                                 | 3/77 (3.9)        | 43/75 (57.3)  | 49/74 (66.2)  | 49/75 (65.3)  | 48/71 (67.6)  | 53/71 (74.6)  |
| Switch to ADA                                                 | 3/125 (2.4)       | 49/124 (39.5) | 62/120 (51.7) | 68/118 (57.6) | 73/115 (63.5) | 67/113 (59.3) |
| ACR50                                                         |                   |               |               |               |               |               |
| Switch to UPA                                                 | 2/77 (2.6)        | 18/77 (23.4)  | 26/73 (35.6)  | 26/73 (35.6)  | 31/71 (43.7)  | 34/69 (49.3)  |
| Switch to ADA                                                 | 2/125 (1.6)       | 12/125 (9.6)  | 23/123 (18.7) | 33/120 (27.5) | 29/115 (25.2) | 29/112 (25.9) |
| ACR70                                                         |                   |               |               |               |               |               |
| Switch to UPA                                                 | 0/77 (0)          | 5/77 (6.5)    | 10/75 (13.3)  | 13/74 (17.6)  | 15/70 (21.4)  | 17/72 (23.6)  |
| Switch to ADA                                                 | 1/125 (0.8)       | 3/125 (2.4)   | 7/123 (5.7)   | 10/120 (8.3)  | 13/117 (11.1) | 14/114 (12.3) |
| <b>B. Incomplete-responders</b>                               |                   |               |               |               |               |               |
| ACR20                                                         |                   |               |               |               |               |               |
| Switch to UPA                                                 | 60/80 (75.0)      | 73/78 (93.6)  | 67/77 (87.0)  | 67/77 (87.0)  | 68/77 (88.3)  | 65/75 (86.7)  |
| Switch to ADA                                                 | 93/122 (76.2)     | 98/124 (79.0) | 94/119 (79.0) | 94/119 (79.0) | 87/118 (73.7) | 92/119 (77.3) |
| ACR50                                                         |                   |               |               |               |               |               |
| Switch to UPA                                                 | 29/80 (36.3)      | 48/78 (61.5)  | 50/75 (66.7)  | 50/75 (66.7)  | 51/76 (67.1)  | 45/72 (62.5)  |
| Switch to ADA                                                 | 38/121 (31.4)     | 46/122 (37.7) | 52/118 (44.1) | 52/118 (44.1) | 56/119 (47.1) | 56/120 (46.7) |
| ACR70                                                         |                   |               |               |               |               |               |
| Switch to UPA                                                 | 2/80 (2.5)        | 19/79 (24.1)  | 23/76 (30.3)  | 23/76 (30.3)  | 27/76 (35.5)  | 29/74 (39.2)  |
| Switch to ADA                                                 | 9/123 (7.3)       | 20/124 (16.1) | 20/122 (16.4) | 20/122 (16.4) | 22/120 (18.3) | 22/119 (18.5) |

Abbreviations: ACR20/50/70, improvement of  $\geq 20\%/50\%/70\%$  in American College of Rheumatology criteria; ADA, adalimumab; UPA, upadacitinib.

| Parameter, n/N (%)              | Weeks Post Switch |               |               |               |               |               |
|---------------------------------|-------------------|---------------|---------------|---------------|---------------|---------------|
|                                 | 0                 | 4             | 8             | 12            | 18            | 24            |
| <b>A. Non-responders</b>        |                   |               |               |               |               |               |
| CDAI LDA                        |                   |               |               |               |               |               |
| Switch to UPA                   | 7/74 (9.5)        | 22/74 (29.7)  | 22/70 (31.4)  | 24/72 (33.3)  | 29/70 (41.4)  | 33/70 (47.1)  |
| Switch to ADA                   | 9/124 (7.3)       | 14/124 (11.3) | 26/121 (21.5) | 33/120 (27.5) | 36/111 (32.4) | 41/114 (36.0) |
| CDAI Remission                  |                   |               |               |               |               |               |
| Switch to UPA                   | 1/74 (1.4)        | 2/74 (2.7)    | 5/70 (7.1)    | 6/72 (8.3)    | 9/70 (12.9)   | 10/70 (14.3)  |
| Switch to ADA                   | 1/124 (0.8)       | 1/124 (0.8)   | 2/121 (1.7)   | 5/120 (4.2)   | 5/111 (4.5)   | 6/114 (5.3)   |
| DAS28(CRP) ≤3.2                 |                   |               |               |               |               |               |
| Switch to UPA                   | 8/74 (10.8)       | 26/74 (35.1)  | 33/73 (45.2)  | 31/74 (41.9)  | 33/70 (47.1)  | 38/70 (54.3)  |
| Switch to ADA                   | 14/121 (11.6)     | 20/123 (16.3) | 31/121 (25.6) | 30/119 (25.2) | 34/112 (30.4) | 38/109 (34.9) |
| DAS28(CRP) <2.6                 |                   |               |               |               |               |               |
| Switch to UPA                   | 3/74 (4.1)        | 15/74 (20.3)  | 19/73 (26.0)  | 19/74 (25.7)  | 19/70 (27.1)  | 22/70 (31.4)  |
| Switch to ADA                   | 5/121 (4.1)       | 11/123 (8.9)  | 13/121 (10.7) | 15/119 (12.6) | 15/112 (13.4) | 21/109 (19.3) |
| <b>B. Incomplete-responders</b> |                   |               |               |               |               |               |
| CDAI LDA                        |                   |               |               |               |               |               |
| Switch to UPA                   | 5/82 (6.1)        | 40/80 (50.0)  | 34/76 (44.7)  | 34/76 (44.7)  | 42/76 (55.3)  | 44/76 (57.9)  |
| Switch to ADA                   | 9/126 (7.1)       | 44/125 (35.2) | 41/122 (33.6) | 41/122 (33.6) | 49/119 (41.2) | 54/120 (45.0) |
| CDAI Remission                  |                   |               |               |               |               |               |
| Switch to UPA                   | 0/82 (0)          | 6/80 (7.5)    | 7/76 (9.2)    | 7/76 (9.2)    | 16/76 (21.1)  | 12/76 (15.8)  |
| Switch to ADA                   | 0/126 (0)         | 4/125 (3.2)   | 3/122 (2.5)   | 3/122 (2.5)   | 5/119 (4.2)   | 6/120 (5.0)   |
| DAS28(CRP) ≤3.2                 |                   |               |               |               |               |               |
| Switch to UPA                   | 10/82 (12.2)      | 46/79 (58.2)  | 46/76 (60.5)  | 46/76 (60.5)  | 48/78 (61.5)  | 44/77 (57.1)  |
| Switch to ADA                   | 28/126 (22.2)     | 48/120 (40.0) | 41/114 (36.0) | 41/114 (36.0) | 45/118 (38.1) | 53/121 (43.8) |
| DAS28(CRP) <2.6                 |                   |               |               |               |               |               |
| Switch to UPA                   | 3/82 (3.7)        | 26/79 (32.9)  | 26/76 (34.2)  | 26/76 (34.2)  | 34/78 (43.6)  | 29/77 (37.7)  |
| Switch to ADA                   | 6/126 (4.8)       | 17/120 (14.2) | 19/114 (16.7) | 19/114 (16.7) | 22/118 (18.6) | 28/121 (23.1) |

Abbreviations: ADA, adalimumab; CDAI, Clinical Disease Activity Index; DAS28(CRP), 28-joint Disease Activity Score based on C-reactive protein; LDA, low disease activity; UPA, upadacitinib.

### Supplementary Material References

1. Jensen Hansen IM, Asmussen Andreasen R, van Bui Hansen MN, Emamifar A. The reliability of disease activity score in 28 joint-C-reactive protein might be overestimated in a subgroup of rheumatoid arthritis patients, when the score is solely based on subjective parameters: a cross-sectional, exploratory study. *J Clin Rheumatol*. 2017;23(2):102-106.
